# Supplementary material for: Non-Specific Responsive Nanogels and Plasmonics to Design MathMaterial Sensing Interfaces: The Case of a Solvent Sensor
Source: MDPI journal article supplement (doi:10.3390/s222410006), 2022-12-19

## Supplementary materials

# Non-Specific Responsive Nanogels and Plasmonics to Design Material Sensing Interfaces. The Case of a Solvent Sensor

Nunzio Cennamo <sup>1</sup>, Francesco Arcadio <sup>1</sup>, Fiore Capasso <sup>1</sup>, Devid Maniglio <sup>2</sup>, Luigi Zeni <sup>1</sup>  
and Alessandra Maria Bossi <sup>3,\*</sup>

- <sup>1</sup> Department of Engineering, University of Campania Luigi Vanvitelli, Via Roma 29, 81031 Aversa, Italy; nunzio.cennamo@unicampania.it (N.C.); francesco.arcadio@unicampania.it (F.A.); fiore.capasso@unicampania.it (F.C.); luigi.zeni@unicampania.it (L.Z.)  
<sup>2</sup> Department of Industrial Engineering, BIOTech Research Center, University of Trento, Via delle Regole 101, Mattarello, 38123 Trento, Italy; devid.maniglio@unitn.it  
<sup>3</sup> Department of Biotechnology, University of Verona, Strada Le Grazie 15, 37134 Verona, Italy  
\* Correspondence: alessandramaria.bossi@univr.it

### Section S1. Synthesis of nanogels

**Table S1.** Composition of the nanogels:

| Sample name | Volume (mL) | Composition (moles)                 |
|-------------|-------------|-------------------------------------|
| NIP80       | 10          | BIS 80% + TBAm 4% + MAA 8% + Aam 8% |

Solutions were bubbled with nitrogen for 20 minutes, to remove oxygen, then the polymerization was started with the addition of 0.1 mL ammonium persulphate (10% w/v) to the final solution volume and of 0.05 mL of TEMED 0.05 to the final volume.

### Section S2. Zeta potential and Z-average

The hydrodynamic size distribution, the associated polydispersity index (PDI) and the Zeta-potential of the nanogels was determined by Dynamic Light Scattering (DLS), and results are reported in Table S2. The corresponding graphs are reported in Figure S1 and Figure S2 respectively.

**Table S2.** Zeta potential and Z-average of the nanogels

| Sample   | Measure | Z <sub>average</sub><br>(nm) | PDI   | ζ-potential<br>(mV) |
|----------|---------|------------------------------|-------|---------------------|
| nanogels | 1       | 89.42                        | 0.187 | -29.8               |
|          | 2       | 89.61                        | 0.183 | -28.9               |
|          | 3       | 88.63                        | 0.179 | -27.3               |

**Figure S1. Size distribution of the nanogels**

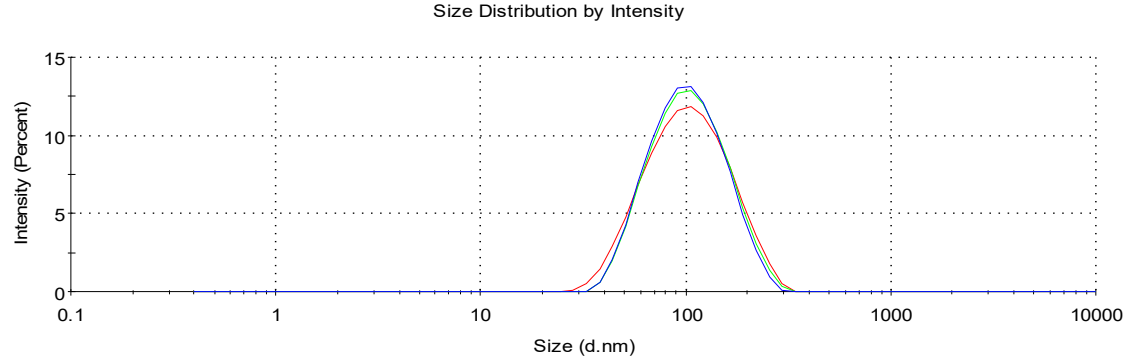

**Figure S2. Zeta potential at pH 7.4 of the nanogels**

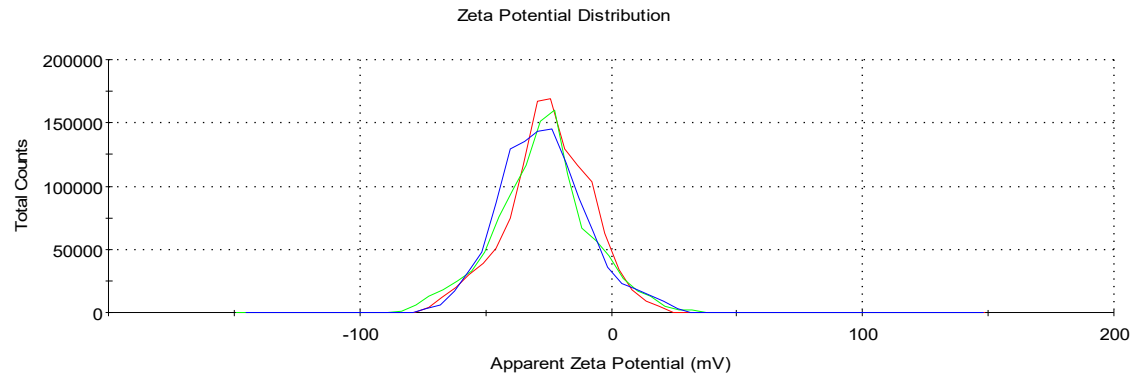

### Section S3. Optical spectra collected from the MathMaterial Sensor

Figure S3. Optical spectra of the surrounding media collected at different times.

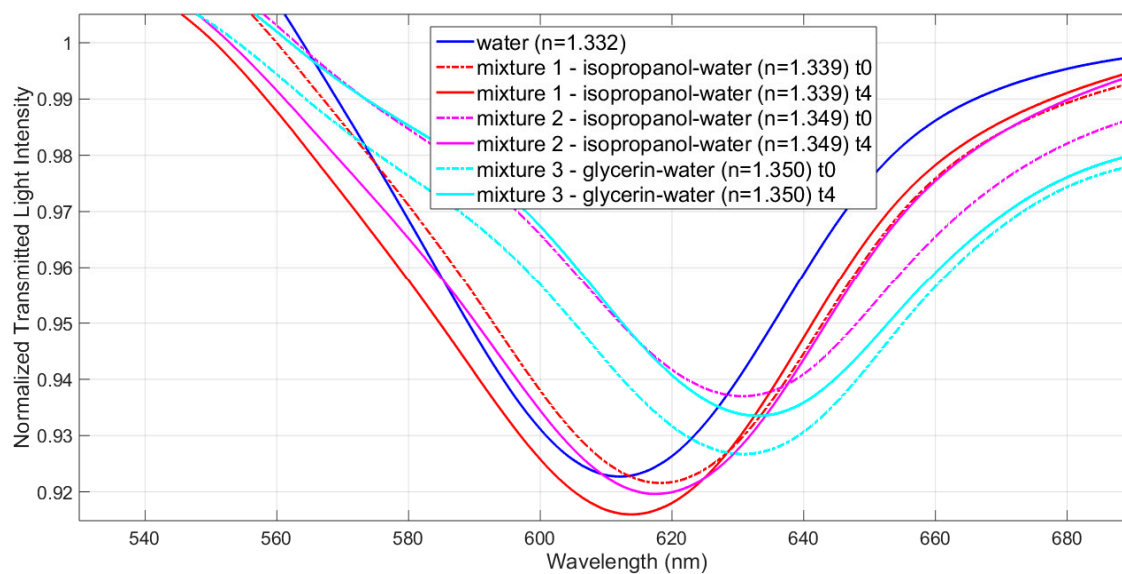

### Section S4. Image of the MathMaterial device

Figure S4. Image of the device.

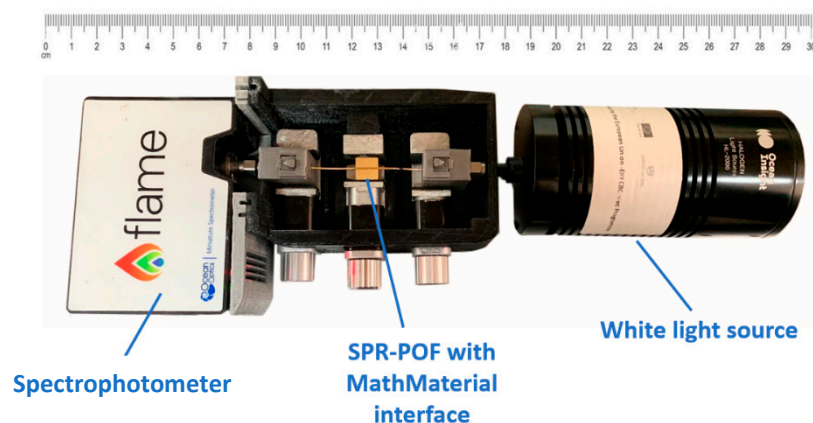

Supplement: s1 [file s1]
